# Supplementary material for: Gas Particle Partitioning of PAHs Emissions from Typical Solid Fuel Combustions as Well as Their Health Risk Assessment in Rural Guanzhong Plain, China
Source: MDPI journal article supplement (doi:10.3390/toxics11010080), 2023-01-15
Supplement: s1 [file s1]

## Supplementary Materials:

# Gas Particle Partitioning of PAHs Emissions from Typical Solid Fuel Combustions as Well as Their Health Risk Assessment in Rural Guanzhong Plain, China

### Text S1

According to the ubiquities of fuel and stove in the region, five types of solid fuels (i.e. clean briquette coal, bituminous coal, maize cob, maize stalk, and wood branch) and three stoves (i.e. one-stage stove, two-stage stove, and firewood stove) were made up into seven fuel-stove groups, which were clean briquette coal and one-stage stove (G1), clean briquette coal and two-stage stove (G2), bituminous coal and one-stage stove (G3), bituminous coal and two-stage stove (G4), maize cob and firewood stove (G5), maize straw and firewood stove (G6), wood branch and firewood stove (G7), respectively. All combustion experiments were conducted strictly in accordance with the habits of the residents.

### Text S2

The PAHs in the samples were extracted by using high purity grade solvents. Each sampling media, PUF or quartz filter, was extracted with 10% v/v diethyl ether in hexane for 16 h at 4 cycles per hour using Soxhlet extractor. Each extract was evaporated to dryness, recombined with cyclohexane and concentrated in kuderna Danish concentrator tube. The extract was then cleaned up with a disposable silica gel column, eluted by using 40% v/v dichloromethane in pentane. The eluent was evaporated and reconstituted with 1 ml acetonitrile. The concentrated extract was vortex mixed and transferred to a brown glass bottle for chromatographic analysis. The final solution was then mixed with 25 mL injection internal standard (fluoranthene-d10, 20 ng/mL) to a total volume of 1 mL. One microliter of each extract was injected into a GC system (7890N, Agilent Technology, Santa Clara, CA) at 280 °C with an autosampler (7693, Agilent Technology). The operating temperature of the injector was set at 250 °C in a splitless mode. The GC oven temperature was initially set at 50 °C, ramped to 150 °C in 4 min and held at this temperature for 10 min, and then increased to 300 °C in 30 min and held at this final temperature for 5 min. The target PAHs were scanned and detected by an MSD (5975C, Agilent Technology) in the selective ion monitoring (SIM) mode. Calibration curves were established by plotting the peak area ratios (analytes/injection internal standard) versus the amounts of the analytes per injection. Target PAHs were identified and quantified using comparison of retention times and chromatographic peaks with those of known calibration curves.

### Text S3

For the PAHs analyses, the calibration curves were established by plotting the peak area ratios (analytes/injection internal standard) versus the amounts of the analytes per injection. Target PAHs were identified and quantified using comparison of retention times and chromatographic peaks with those of known calibration curves. Five-point calibration plots achieved linear correlation coefficients  $r^2 > 0.995$ . The recoveries were also determined by spiking an equivalent loading of a mid-level concentration of the calibration standard onto the sampling medium with the two internal standards (IS) of phenanthrene (phe-d<sub>10</sub>) and chrysene (chr-d<sub>12</sub>). Five replicate tests were conducted for each sampling media. The concentrations reported here have been corrected for their individual recoveries.

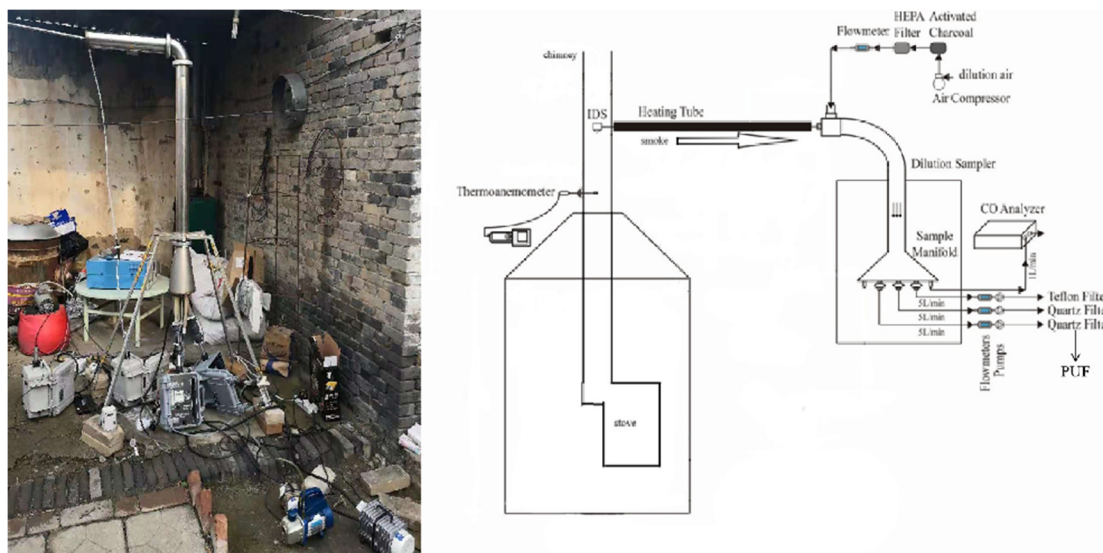

**Figure S1.** The simple structure of dilution system.

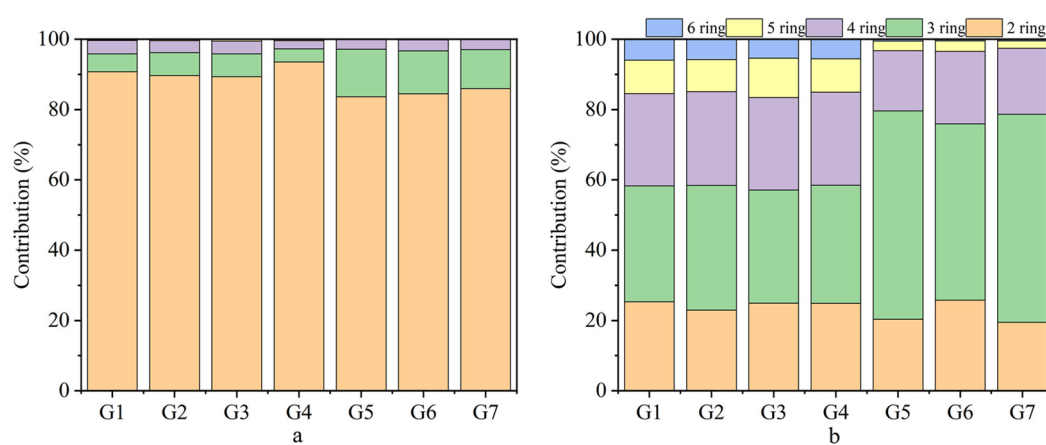

**Figure S2.** The number of aromatic rings distributions of PAHs in gaseous (a) and particulate phases (b).

**Table S1.** Individual profile of PAHs (MW = molar weight, LOD = limit of detection) (Mean  $\pm$  Standard Deviation).

| Particulate phase         | Abbreviation | MW<br>(g/mol) | rings | LOD<br>( $\mu$ g) |
|---------------------------|--------------|---------------|-------|-------------------|
| 2-methylnaphthalene       | 2M-NAP       | 142.2         | 2     | 0.00623           |
| acenaphthylene            | ACY          | 152.2         | 2     | 0.00435           |
| acenaphthene              | ACE          | 154.21        | 2     | 0.00315           |
| fluorene                  | FLO          | 166.22        | 2     | 0.00460           |
| phenanthrene              | PHE          | 178.23        | 3     | 0.00590           |
| anthracene                | ANT          | 178.23        | 3     | 0.01020           |
| pyrene                    | PYR          | 202.25        | 4     | 0.00950           |
| fluoranthene              | FLA          | 202.26        | 4     | 0.00820           |
| cyclopenta[cd]pyrene      | CPP          | 226.27        | 4     | 0.00108           |
| benzo[a]anthracene        | BaA          | 228.29        | 4     | 0.01030           |
| chrysene                  | CHR          | 228.29        | 4     | 0.00820           |
| benzo[b]fluoranthene      | BbF          | 252.31        | 4     | 0.00420           |
| benzo[k]fluoranthene      | BkF          | 252.31        | 4     | 0.00398           |
| benzo[e]pyrene            | BeP          | 252.31        | 5     | 0.00626           |
| benzo[a]pyrene            | BaP          | 252.31        | 5     | 0.00356           |
| perylene                  | PER          | 252.31        | 5     | 0.00038           |
| indeno[1,2,3-cd]pyrene    | IcdP         | 276.33        | 5     | 0.00623           |
| benzo[ghi]perylene        | BghiP        | 276.33        | 6     | 0.00365           |
| dibenzo[a,h]anthracene    | DBahA        | 278.35        | 5     | 0.00099           |
| dibenzo[a,e]pyrene        | DBaeP        | 302.37        | 6     | 0.00359           |
| 6H-benzo(c,d)pyrene-6-one | BcdPQ        | 254.28        | 5     | 0.00850           |
| 5-nitroacenaphthene       | 5N-ACE       | 199.2         | 2     | 0.00650           |
| 2-nitrofluorene           | 2N-FLO       | 211.22        | 2     | 0.00490           |
| 9-nitroanthracene         | 9N-ANT       | 223.23        | 3     | 0.00820           |
| 3-nitrofluoranthene       | 3N-FLA       | 247.25        | 3     | 0.01060           |
| 1-nitropyrene             | 1N-PYR       | 247.26        | 4     | 0.01220           |
| 6-nitrochrysene           | 6N-CHR       | 273           | 4     | 0.01020           |
| 1,3-dinitropyrene         | 1,3-DNP      | 292.26        | 4     | 0.00980           |
| 1,6-dinitropyrene         | 1,6-DNP      | 292.26        | 4     | 0.01560           |

**Table S2.** The quantified ion and extraction recovery for each PAHs (SD = Standard Deviation).

| PAH                       |          | Particle phase |             | Gas Phase     |             |
|---------------------------|----------|----------------|-------------|---------------|-------------|
| PAH/OPAH/APAH             | Qual Ion | Recovery-Mean  | Recovery-SD | Recovery-Mean | Recovery-SD |
| acenaphthylene            | 152      | 78.6%          | 6.2%        | 69.2%         | 7.7%        |
| acenaphthene              | 154      | 81.9%          | 8.7%        | 71.1%         | 6.8%        |
| fluorene                  | 166      | 86.1%          | 5.9%        | 80.8%         | 7.0%        |
| phenanthrene              | 178      | 90.0%          | 4.8%        | 82.5%         | 5.5%        |
| anthracene                | 178      | 90.0%          | 5.1%        | 88.3%         | 5.8%        |
| fluoranthene              | 202      | 90.4%          | 5.3%        | 89.3%         | 6.0%        |
| pyrene                    | 202      | 91.0%          | 7.5%        | 88.2%         | 6.2%        |
| benzo[a]anthracene        | 228      | 92.2%          | 4.8%        | 90.0%         | 5.1%        |
| chrysene                  | 228      | 93.3%          | 4.6%        | 91.0%         | 5.0%        |
| benzo[b]fluoranthene      | 252      | 93.4%          | 5.8%        | 91.7%         | 6.2%        |
| benzo[k]fluoranthene      | 252      | 93.4%          | 4.9%        | 94.6%         | 5.2%        |
| benzo[e]pyrene            | 252      | 93.8%          | 6.0%        | 94.3%         | 6.3%        |
| benzo[a]pyrene            | 252      | 95.8%          | 5.3%        | 95.3%         | 5.5%        |
| indeno[1,2,3-cd]pyrene    | 276      | 95.0%          | 5.3%        | 94.2%         | 5.4%        |
| dibenzo[a,h]anthracene    | 278      | 95.0%          | 5.6%        | 94.0%         | 5.1%        |
| benzo[ghi]perylene        | 276      | 95.2%          | 4.1%        | 93.1%         | 4.5%        |
| dibenzo[a,e]pyrene        | 302      | 95.5%          | 4.9%        | 92.0%         | 4.9%        |
| 2-methylnaphthalene       | 142      | 82.7%          | 4.2%        | 80.0%         | 6.7%        |
| cyclopenta[cd]pyrene      | 226      | 90.5%          | 4.5%        | 90.1%         | 4.5%        |
| 6H-benzo(c,d)pyrene-6-one | 254      | 93.6%          | 5.5%        | 93.1%         | 5.1%        |
| PAH                       |          | Particle Phase |             | Gas Phase     |             |
| NPAHs                     | Qual Ion | Recovery-Mean  | Recovery-SD | Recovery-Mean | Recovery-SD |
| 5-nitroacenaphthene       | 199      | 91.8%          | 5.2%        | 89.5%         | 4.9%        |
| 2-nitrofluorene           | 211      | 92.1%          | 5.1%        | 88.7%         | 4.8%        |
| 9-nitroanthracene         | 223      | 94.2%          | 4.8%        | 90.0%         | 4.0%        |
| 3-nitrofluoranthene       | 247      | 95.1%          | 4.0%        | 94.4%         | 4.8%        |
| 1-nitropyrene             | 247      | 95.8%          | 5.8%        | 95.7%         | 5.4%        |
| 6-nitrochrysene           | 273      | 96.3%          | 5.0%        | 96.5%         | 5.7%        |
| 1,3-dinitropyrene         | 292      | 97.5%          | 5.1%        | 94.7%         | 4.8%        |
| 1,6-dinitropyrene         | 292      | 98.6%          | 4.3%        | 94.0%         | 4.8%        |

**Table S3.** TEF of 29 PAHs involved in this study.

| PAH Species               | TEF    | MEF     |
|---------------------------|--------|---------|
| Naphthalene               | 0.001  | -       |
| Acenaphthylene            | 0.001  | -       |
| Acenaphthene              | 0.001  | 0.00056 |
| Fluorene                  | 0.001  | -       |
| Phenanthrene              | 0.001  | -       |
| Anthracene                | 0.01   | -       |
| Fluoranthene              | 0.001  | -       |
| Pyrene                    | 0.001  | -       |
| benzo[a]anthracene        | 0.1    | 0.082   |
| Chrysene                  | 0.01   | 0.017   |
| benzo[b]fluoranthene      | 0.1    | 0.25    |
| benzo[k]fluoranthene      | 0.1    | 0.11    |
| benzo[e]pyrene            | 0.002  | -       |
| benzo[a]pyrene            | 1      | 1       |
| indeno[1,2,3-cd]pyrene    | 0.1    | 0.31    |
| dibenzo[a,h]anthracene    | 5      | 0.29    |
| benzo[ghi]perylene        | 0.01   | 0.19    |
| dibenzo[a,e]pyrene        | 2.9    | -       |
| 2-methylnaphthalene       | 0.001  | -       |
| cyclopenta[cd]pyrene      | 6.9    | -       |
| 6H-benzo(c,d)pyrene-6-one | 0.32   | -       |
| 5-nitroacenaphthene       | 0.01   | -       |
| 2-nitrofluorene           | 0.01   | -       |
| 9-nitroanthracene         | 0.0032 | -       |
| 3-nitrofluoranthene       | 0.0026 | -       |
| 1-nitropyrene             | 0.1    | -       |
| 6-nitrochrysene           | 10     | -       |
| 1,3-dinitropyrene         | 0.031  | -       |
| 1,6-dinitropyrene         | 0.28   | -       |

**Table S4.** Parameters settings in non-cancer and cancer risk assessment.

| Parameter                     | Adult Male                         | Adult Female                        |
|-------------------------------|------------------------------------|-------------------------------------|
| Inhalation rate               | 0.8 m <sup>3</sup> h <sup>-1</sup> | 0.59 m <sup>3</sup> h <sup>-1</sup> |
| Average BW <sup>a</sup>       | 67.1 kg                            | 57.3 kg                             |
| Average time spend in indoor  | 8 hr·day <sup>-1b</sup>            | 8 hr·day <sup>-1</sup>              |
| Annual heating period         | 120 days·year <sup>-1c</sup>       | 120 days·year <sup>-1</sup>         |
| Total number of exposure days | 15695 days                         | 15695 days                          |
| Average lifetime              | 70 years <sup>d</sup>              | 70 years                            |

<sup>a</sup> National Statistics Bureau of China;

<sup>b</sup> ~7 hours for sleeping and ~3 hours for resting and relaxing. Due to the habit of the residents, the bedrooms undertook the function of general bedrooms and living rooms, thus 10 hours were all spent in bedrooms in calculation;

<sup>c</sup> Heating period generally from 1<sup>st</sup> Dec. to 10<sup>th</sup> Mar next year, totally ~100 days per year;

<sup>d</sup> According to the risk model by USEPA.

**Table S5.** BaP<sub>MEQ</sub> (MEQ) of gas and particulate phases PAHs from seven different combustion scenarios.

|                        | G1   | G2   | G3    | G4    | G5   | G6   | G7   |
|------------------------|------|------|-------|-------|------|------|------|
| Gaseous phase PAHs     | 0.03 | 0.03 | 1.12  | 2.85  | 0.31 | 0.59 | 0.21 |
| Particulate phase PAHs | 0.29 | 0.29 | 10.66 | 18.12 | 2.18 | 3.29 | 1.45 |

**Table S6.** Cancer risk for Males of individual PAHs species in gaseous phase.

|       | Species | G1       | G2       | G3       | G4       | G5       | G6       | G7       |
|-------|---------|----------|----------|----------|----------|----------|----------|----------|
| pPAHs | NAP     | 1.55E-05 | 1.72E-05 | 4.00E-04 | 8.98E-04 | 2.71E-04 | 4.58E-04 | 2.57E-04 |
|       | ACY     | 1.58E-08 | 1.85E-08 | 5.62E-07 | 8.03E-07 | 1.35E-05 | 2.87E-05 | 1.26E-05 |
|       | ACE     | 1.62E-08 | 1.60E-08 | 7.72E-07 | 8.84E-07 | 8.64E-07 | 1.42E-06 | 6.67E-07 |
|       | FLO     | 3.74E-07 | 3.14E-07 | 6.94E-06 | 1.19E-05 | 3.89E-06 | 5.30E-06 | 1.56E-06 |
|       | PHE     | 7.23E-07 | 1.11E-06 | 2.54E-05 | 2.80E-05 | 3.18E-05 | 4.28E-05 | 2.25E-05 |
|       | ANT     | 1.21E-06 | 1.24E-06 | 2.90E-05 | 4.78E-05 | 3.75E-05 | 6.32E-05 | 1.51E-05 |
|       | FLA     | 9.28E-08 | 7.97E-08 | 3.24E-06 | 3.81E-06 | 1.27E-05 | 2.38E-05 | 1.07E-05 |
|       | PYR     | 1.46E-07 | 1.61E-07 | 3.50E-06 | 4.37E-06 | 6.01E-06 | 1.29E-05 | 5.50E-06 |
|       | BaA     | 1.05E-05 | 1.69E-05 | 3.02E-04 | 4.79E-04 | 1.29E-04 | 2.05E-04 | 1.14E-04 |
|       | CHR     | 3.54E-06 | 2.74E-06 | 7.23E-05 | 1.02E-04 | 1.08E-05 | 1.98E-05 | 1.83E-05 |
|       | BbF     | 8.73E-06 | 7.49E-06 | 3.12E-04 | 4.11E-04 | 3.21E-05 | 4.61E-05 | 1.90E-05 |
|       | BkF     | 7.88E-07 | 6.55E-07 | 3.07E-05 | 3.25E-05 | 5.38E-05 | 8.45E-05 | 2.28E-05 |
|       | BeP     | 7.71E-08 | 9.43E-08 | 2.24E-06 | 2.25E-06 | 3.02E-07 | 9.42E-07 | 3.64E-07 |
|       | BaP     | 3.70E-05 | 3.76E-05 | 1.14E-03 | 2.71E-03 | 1.99E-04 | 5.29E-04 | 1.04E-04 |
|       | CPP     | 2.03E-05 | 3.15E-05 | 7.40E-04 | 1.39E-03 | 2.46E-03 | 2.96E-03 | 1.46E-03 |
| aPAHs | 2M-NAP  | 8.46E-07 | 7.19E-07 | 1.94E-05 | 3.36E-05 | 2.06E-06 | 1.22E-05 | 2.13E-06 |
| oPAHs | BcdPQ   | 2.37E-06 | 2.18E-06 | 1.19E-04 | 1.01E-04 | 3.53E-05 | 9.55E-05 | 1.73E-05 |
| nPAHs | 5N-ACE  | 4.80E-09 | 4.17E-09 | 1.23E-07 | 1.58E-07 | 3.65E-08 | 7.75E-08 | 3.81E-08 |
|       | 2N-FLO  | 1.74E-09 | 1.43E-09 | 7.17E-08 | 6.22E-08 | 1.73E-08 | 2.98E-08 | 1.12E-08 |
|       | 9N-PHE  | 1.88E-10 | 1.77E-10 | 7.19E-09 | 6.40E-09 | 4.92E-09 | 5.43E-09 | 3.39E-09 |
|       | 3N-FLA  | 3.28E-10 | 4.41E-10 | 1.20E-08 | 1.40E-08 | 3.24E-09 | 8.40E-09 | 4.10E-09 |
|       | 1N-PYR  | 1.04E-07 | 6.14E-08 | 2.06E-06 | 2.56E-06 | 1.64E-06 | 2.32E-06 | 7.44E-07 |
|       | 6N-CHR  | 2.44E-07 | 3.49E-07 | 1.12E-05 | 1.18E-05 | 8.58E-05 | 1.43E-04 | 4.20E-05 |
|       | 1,3-DNP | 2.15E-09 | 2.95E-09 | 9.08E-08 | 1.39E-07 | 1.74E-07 | 2.72E-07 | 1.24E-07 |
|       | 1,6-DNP | 1.67E-08 | 2.29E-08 | 4.68E-07 | 1.41E-06 | 2.79E-06 | 5.26E-06 | 1.65E-06 |

**Table S7.** Cancer risk for Females of individual PAHs species in gaseous phase.

|       | Species | G1       | G2       | G3       | G4       | G5       | G6       | G7       |
|-------|---------|----------|----------|----------|----------|----------|----------|----------|
| pPAHs | NAP     | 1.34E-05 | 1.48E-05 | 3.45E-04 | 7.76E-04 | 2.34E-04 | 3.96E-04 | 2.22E-04 |
|       | ACY     | 1.36E-08 | 1.60E-08 | 4.85E-07 | 6.93E-07 | 1.17E-05 | 2.48E-05 | 1.09E-05 |
|       | ACE     | 1.40E-08 | 1.38E-08 | 6.66E-07 | 7.64E-07 | 7.46E-07 | 1.22E-06 | 5.76E-07 |
|       | FLO     | 3.23E-07 | 2.71E-07 | 5.99E-06 | 1.02E-05 | 3.36E-06 | 4.58E-06 | 1.35E-06 |
|       | PHE     | 6.24E-07 | 9.58E-07 | 2.20E-05 | 2.42E-05 | 2.74E-05 | 3.69E-05 | 1.94E-05 |
|       | ANT     | 1.05E-06 | 1.07E-06 | 2.50E-05 | 4.13E-05 | 3.24E-05 | 5.46E-05 | 1.30E-05 |
|       | FLA     | 8.02E-08 | 6.88E-08 | 2.80E-06 | 3.29E-06 | 1.10E-05 | 2.05E-05 | 9.25E-06 |
|       | PYR     | 1.26E-07 | 1.39E-07 | 3.03E-06 | 3.77E-06 | 5.19E-06 | 1.11E-05 | 4.75E-06 |
|       | BaA     | 9.08E-06 | 1.46E-05 | 2.61E-04 | 4.14E-04 | 1.11E-04 | 1.77E-04 | 9.84E-05 |
|       | CHR     | 3.05E-06 | 2.37E-06 | 6.24E-05 | 8.84E-05 | 9.32E-06 | 1.71E-05 | 1.58E-05 |
|       | BbF     | 7.54E-06 | 6.47E-06 | 2.69E-04 | 3.55E-04 | 2.78E-05 | 3.98E-05 | 1.64E-05 |
|       | BkF     | 6.81E-07 | 5.66E-07 | 2.65E-05 | 2.81E-05 | 4.65E-05 | 7.30E-05 | 1.97E-05 |
|       | BeP     | 6.66E-08 | 8.15E-08 | 1.94E-06 | 1.94E-06 | 2.61E-07 | 8.13E-07 | 3.14E-07 |
|       | BaP     | 3.19E-05 | 3.25E-05 | 9.87E-04 | 2.34E-03 | 1.72E-04 | 4.57E-04 | 8.94E-05 |
|       | CPP     | 1.75E-05 | 2.72E-05 | 6.39E-04 | 1.20E-03 | 2.12E-03 | 2.55E-03 | 1.26E-03 |
| aPAHs | 2M-NAP  | 7.31E-07 | 6.21E-07 | 1.68E-05 | 2.91E-05 | 1.78E-06 | 1.05E-05 | 1.84E-06 |
| oPAHs | BcdPQ   | 2.04E-06 | 1.88E-06 | 1.02E-04 | 8.68E-05 | 3.05E-05 | 8.25E-05 | 1.50E-05 |
| nPAHs | 5N-ACE  | 4.15E-09 | 3.60E-09 | 1.06E-07 | 1.37E-07 | 3.16E-08 | 6.69E-08 | 3.29E-08 |
|       | 2N-FLO  | 1.50E-09 | 1.24E-09 | 6.19E-08 | 5.37E-08 | 1.49E-08 | 2.58E-08 | 9.64E-09 |
|       | 9N-PHE  | 1.62E-10 | 1.53E-10 | 6.21E-09 | 5.53E-09 | 4.25E-09 | 4.69E-09 | 2.92E-09 |
|       | 3N-FLA  | 2.83E-10 | 3.81E-10 | 1.04E-08 | 1.21E-08 | 2.80E-09 | 7.25E-09 | 3.54E-09 |
|       | 1N-PYR  | 9.02E-08 | 5.30E-08 | 1.78E-06 | 2.21E-06 | 1.42E-06 | 2.00E-06 | 6.42E-07 |
|       | 6N-CHR  | 2.11E-07 | 3.01E-07 | 9.70E-06 | 1.02E-05 | 7.41E-05 | 1.24E-04 | 3.63E-05 |
|       | 1,3-DNP | 1.85E-09 | 2.55E-09 | 7.84E-08 | 1.20E-07 | 1.50E-07 | 2.35E-07 | 1.07E-07 |
|       | 1,6-DNP | 1.45E-08 | 1.98E-08 | 4.05E-07 | 1.22E-06 | 2.41E-06 | 4.54E-06 | 1.43E-06 |

**Table S8.** Cancer risk for Males of individual PAHs species in particulate phase.

|       | Species | G1       | G2       | G3       | G4       | G5       | G6       | G7       |
|-------|---------|----------|----------|----------|----------|----------|----------|----------|
| pPAHs | ACY     | 3.44E-08 | 2.94E-08 | 9.95E-07 | 1.44E-06 | 1.88E-05 | 4.59E-05 | 1.95E-05 |
|       | ACE     | 3.15E-08 | 2.84E-08 | 1.05E-06 | 1.09E-06 | 1.43E-06 | 2.24E-06 | 1.13E-06 |
|       | FLO     | 6.44E-07 | 7.25E-07 | 1.66E-05 | 2.93E-05 | 6.39E-06 | 1.07E-05 | 3.59E-06 |
|       | PHE     | 1.63E-06 | 1.89E-06 | 4.51E-05 | 7.22E-05 | 4.70E-05 | 6.74E-05 | 3.63E-05 |
|       | ANT     | 2.97E-06 | 2.83E-06 | 7.35E-05 | 1.14E-04 | 8.91E-05 | 1.68E-04 | 5.65E-05 |
|       | FLA     | 2.72E-07 | 2.44E-07 | 7.35E-06 | 8.68E-06 | 3.12E-05 | 5.68E-05 | 3.72E-05 |
|       | PYR     | 3.88E-07 | 3.74E-07 | 9.13E-06 | 1.54E-05 | 1.47E-05 | 4.00E-05 | 1.58E-05 |
|       | BaA     | 2.85E-05 | 3.15E-05 | 8.34E-04 | 1.34E-03 | 3.43E-04 | 5.04E-04 | 2.70E-04 |
|       | CHR     | 6.23E-06 | 6.88E-06 | 1.72E-04 | 2.38E-04 | 2.83E-05 | 5.23E-05 | 4.10E-05 |
|       | BbF     | 4.06E-05 | 3.93E-05 | 1.23E-03 | 1.90E-03 | 1.32E-04 | 2.42E-04 | 8.45E-05 |
|       | BkF     | 4.67E-06 | 3.97E-06 | 1.28E-04 | 1.72E-04 | 2.05E-04 | 3.80E-04 | 1.30E-04 |
|       | BeP     | 3.35E-07 | 3.72E-07 | 1.36E-05 | 1.06E-05 | 1.74E-06 | 4.56E-06 | 1.88E-06 |
|       | BaP     | 2.66E-04 | 2.25E-04 | 8.74E-03 | 1.33E-02 | 1.29E-03 | 2.73E-03 | 6.21E-04 |
|       | IcdP    | 7.68E-06 | 7.33E-06 | 1.77E-04 | 2.98E-04 | 8.46E-05 | 1.56E-04 | 7.62E-05 |
|       | DBahA   | 3.45E-04 | 4.23E-04 | 9.95E-03 | 1.46E-02 | 6.94E-04 | 7.68E-04 | 4.23E-04 |
|       | BghiP   | 2.69E-06 | 2.95E-06 | 7.19E-05 | 1.08E-04 | 7.90E-06 | 1.37E-05 | 6.44E-06 |
| aPAHs | DBaeP   | 3.83E-04 | 2.93E-04 | 8.06E-03 | 1.35E-02 | 8.16E-05 | 1.79E-04 | 1.12E-04 |
|       | CPP     | 3.85E-05 | 6.62E-05 | 1.87E-03 | 3.09E-03 | 5.43E-03 | 6.85E-03 | 3.09E-03 |
| oPAHs | 2M-NAP  | 9.87E-07 | 7.79E-07 | 2.65E-05 | 3.70E-05 | 2.78E-06 | 1.46E-05 | 2.11E-06 |
| nPAHs | BcdPQ   | 1.56E-05 | 1.53E-05 | 4.64E-04 | 6.39E-04 | 2.25E-04 | 5.26E-04 | 1.05E-04 |
|       | 5N-ACE  | 8.02E-09 | 7.08E-09 | 1.98E-07 | 2.84E-07 | 4.75E-08 | 1.24E-07 | 4.57E-08 |
|       | 2N-FLO  | 2.29E-09 | 2.51E-09 | 7.30E-08 | 1.06E-07 | 2.10E-08 | 3.22E-08 | 1.11E-08 |
|       | 9N-PHE  | 3.18E-10 | 2.46E-10 | 7.85E-09 | 1.12E-08 | 7.16E-09 | 1.26E-08 | 5.87E-09 |
|       | 3N-FLA  | 6.37E-10 | 8.62E-10 | 2.30E-08 | 3.04E-08 | 5.54E-09 | 1.85E-08 | 7.69E-09 |
|       | 1N-PYR  | 1.29E-07 | 1.07E-07 | 3.25E-06 | 5.43E-06 | 2.59E-06 | 4.61E-06 | 1.54E-06 |
|       | 6N-CHR  | 7.11E-07 | 9.48E-07 | 2.11E-05 | 3.45E-05 | 2.09E-04 | 3.44E-04 | 1.20E-04 |
|       | 1,3-DNP | 7.06E-09 | 7.05E-09 | 2.03E-07 | 2.62E-07 | 3.32E-07 | 5.48E-07 | 2.76E-07 |
|       | 1,6-DNP | 5.44E-08 | 5.10E-08 | 1.47E-06 | 3.00E-06 | 7.87E-06 | 1.33E-05 | 3.69E-06 |



**Table S9.** Cancer risk for Females of individual PAHs species in particulate phase.

|       | Species | G1       | G2       | G3       | G4       | G5       | G6       | G7       |
|-------|---------|----------|----------|----------|----------|----------|----------|----------|
| pPAHs | ACY     | 2.97E-08 | 2.54E-08 | 8.59E-07 | 1.24E-06 | 1.63E-05 | 3.97E-05 | 1.69E-05 |
|       | ACE     | 2.72E-08 | 2.45E-08 | 9.03E-07 | 9.40E-07 | 1.23E-06 | 1.93E-06 | 9.77E-07 |
|       | FLO     | 5.56E-07 | 6.26E-07 | 1.43E-05 | 2.53E-05 | 5.52E-06 | 9.24E-06 | 3.10E-06 |
|       | PHE     | 1.40E-06 | 1.63E-06 | 3.90E-05 | 6.24E-05 | 4.06E-05 | 5.82E-05 | 3.13E-05 |
|       | ANT     | 2.56E-06 | 2.44E-06 | 6.35E-05 | 9.85E-05 | 7.69E-05 | 1.45E-04 | 4.88E-05 |
|       | FLA     | 2.35E-07 | 2.11E-07 | 6.35E-06 | 7.49E-06 | 2.70E-05 | 4.91E-05 | 3.21E-05 |
|       | PYR     | 3.35E-07 | 3.23E-07 | 7.89E-06 | 1.33E-05 | 1.27E-05 | 3.45E-05 | 1.36E-05 |
|       | BaA     | 2.46E-05 | 2.72E-05 | 7.20E-04 | 1.16E-03 | 2.96E-04 | 4.35E-04 | 2.33E-04 |
|       | CHR     | 5.38E-06 | 5.94E-06 | 1.49E-04 | 2.05E-04 | 2.45E-05 | 4.52E-05 | 3.54E-05 |
|       | BbF     | 3.51E-05 | 3.39E-05 | 1.06E-03 | 1.64E-03 | 1.14E-04 | 2.09E-04 | 7.30E-05 |
|       | BkF     | 4.03E-06 | 3.43E-06 | 1.11E-04 | 1.48E-04 | 1.77E-04 | 3.28E-04 | 1.12E-04 |
|       | BeP     | 2.90E-07 | 3.21E-07 | 1.17E-05 | 9.19E-06 | 1.50E-06 | 3.94E-06 | 1.62E-06 |
|       | BaP     | 2.30E-04 | 1.94E-04 | 7.55E-03 | 1.15E-02 | 1.11E-03 | 2.36E-03 | 5.37E-04 |
|       | IcdP    | 6.63E-06 | 6.33E-06 | 1.53E-04 | 2.57E-04 | 7.30E-05 | 1.35E-04 | 6.58E-05 |
|       | DBahA   | 2.98E-04 | 3.65E-04 | 8.59E-03 | 1.27E-02 | 6.00E-04 | 6.63E-04 | 3.66E-04 |
|       | BghiP   | 2.32E-06 | 2.54E-06 | 6.21E-05 | 9.36E-05 | 6.82E-06 | 1.18E-05 | 5.56E-06 |
| aPAHs | DBaeP   | 3.31E-04 | 2.53E-04 | 6.96E-03 | 1.16E-02 | 7.05E-05 | 1.55E-04 | 9.68E-05 |
|       | CPP     | 3.32E-05 | 5.72E-05 | 1.62E-03 | 2.67E-03 | 4.69E-03 | 5.92E-03 | 2.67E-03 |
| oPAHs | 2M-NAP  | 8.52E-07 | 6.72E-07 | 2.29E-05 | 3.19E-05 | 2.40E-06 | 1.26E-05 | 1.82E-06 |
|       | BcdPQ   | 1.35E-05 | 1.32E-05 | 4.00E-04 | 5.52E-04 | 1.94E-04 | 4.55E-04 | 9.05E-05 |
| nPAHs | 5N-ACE  | 6.92E-09 | 6.12E-09 | 1.71E-07 | 2.46E-07 | 4.10E-08 | 1.07E-07 | 3.94E-08 |
|       | 2N-FLO  | 1.98E-09 | 2.16E-09 | 6.31E-08 | 9.12E-08 | 1.82E-08 | 2.78E-08 | 9.59E-09 |
|       | 9N-PHE  | 2.74E-10 | 2.13E-10 | 6.78E-09 | 9.68E-09 | 6.18E-09 | 1.08E-08 | 5.07E-09 |
|       | 3N-FLA  | 5.50E-10 | 7.45E-10 | 1.98E-08 | 2.62E-08 | 4.78E-09 | 1.59E-08 | 6.65E-09 |
|       | 1N-PYR  | 1.11E-07 | 9.20E-08 | 2.81E-06 | 4.69E-06 | 2.24E-06 | 3.98E-06 | 1.33E-06 |
|       | 6N-CHR  | 6.14E-07 | 8.18E-07 | 1.82E-05 | 2.98E-05 | 1.81E-04 | 2.97E-04 | 1.04E-04 |
|       | 1,3-DNP | 6.09E-09 | 6.09E-09 | 1.76E-07 | 2.27E-07 | 2.86E-07 | 4.73E-07 | 2.38E-07 |
|       | 1,6-DNP | 4.70E-08 | 4.40E-08 | 1.27E-06 | 2.59E-06 | 6.80E-06 | 1.15E-05 | 3.18E-06 |
